# Supplementary material for: Immune Exclusion Is Frequent in Small-Cell Carcinoma of the Bladder
Source: Hindawi journal article supplement (doi:10.1155/2019/2532518), 2019-05-02
Supplement: f1 [file 2532518.f1.pdf]

## Supplementary information

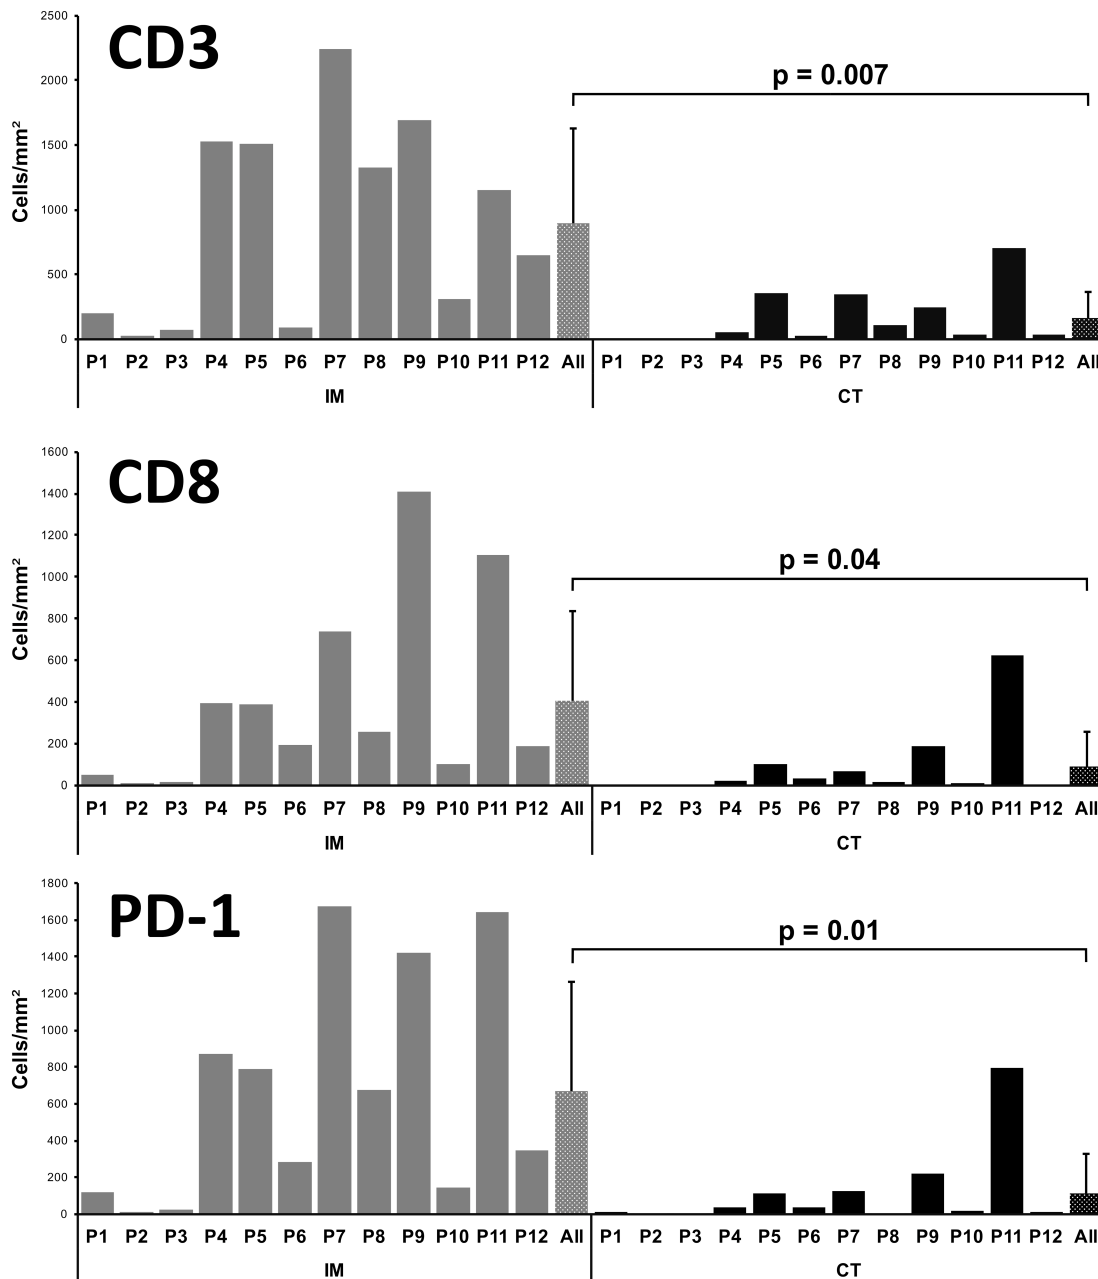

**Figure S1.** CD3, CD8 and PD-1 positive cell densities of 12 patients with small cell carcinoma of the bladder at the invasive margin (IM) and the center of the tumor (CT) (P1-P12).
